# Supplementary material
Source: Springer Nature journal article supplement (https://publikationen.ub.uni-frankfurt.de/opus4/files/7233/12943_2009_471_MOESM4_ESM.PDF)
Supplement: MOESM4 [file 12943_2009_471_MOESM4_ESM.PDF]

**acetyl. histone H4K12**

**histone H4**

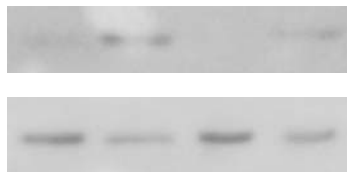

**AML-193**

**acetyl. histone H4K12**

**histone H4**

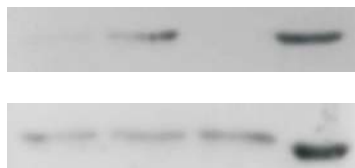

**SKM-1**

**acetyl. histone H4K12**

**histone H4**

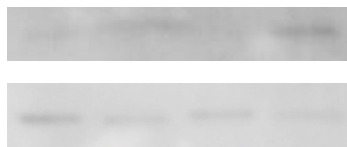

**U-937**
